# Supplementary material
Source: publisher figshare collection journal article supplement (https://diabetesjournals.figshare.com/articles/dataset/_/24653628)
Supplement: Supplementary file 1 [file 1]

# Supplementary Appendix

Impact of Treatment on Health-Related Quality of Life in the Glycemia Reduction Approaches in Diabetes (GRADE) Study: A Comparative Effectiveness Randomized Clinical Trial

**Authors:** Andrea L. Cherrington, Mark T. Tripputi, Naji Younes, William H. Herman, Aimee Katona, Erik J. Groessl, Jacqueline Craig, Jeffrey S. Gonzalez, Rajesh Garg, Sabina Casula, Shihchen Kuo, and Hermes J. Florez, for the GRADE Research Group.

## Table of Contents

|                                                                                                                        |           |
|------------------------------------------------------------------------------------------------------------------------|-----------|
| <b>GRADE Research Group Listing .....</b>                                                                              | <b>2</b>  |
| <b>Figure S1. CONSORT Diagram .....</b>                                                                                | <b>5</b>  |
| <b>Figure S2: Plot of mean weight over time in study by treatment group .....</b>                                      | <b>6</b>  |
| <b>Table S1: Baseline characteristics of study population .....</b>                                                    | <b>7</b>  |
| <b>Table S2: Mean change from baseline for all component outcomes of the SF-36 .....</b>                               | <b>8</b>  |
| <b>Table S3: Number of participants initiating rescue insulin by study year .....</b>                                  | <b>9</b>  |
| <b>Table S4: Mediation Analysis of 1-year PCS change scores. ....</b>                                                  | <b>10</b> |
| <b>Table S5: Subgroup analysis of the PCS change at annual visits by baseline body mass index (BMI) tertiles .....</b> | <b>11</b> |

## GRADE Research Group (April 30, 2021)

**Designations:** Principal Investigator (PI); Co-Principal Investigator (Co-PI); Co-Investigator (Co-I); Study Coordinator (SC); Recruitment/Retention Coordinator (RC); Research Staff (RS)

### Current Clinical Centers

**Albert Einstein College of Medicine:** Crandall, JP (PI); McKee, MD (Co-PI, past); Behringer-Massera, S (Co-I, past); Brown-Friday, J (SC); Xhori, E (RC, past); Ballentine-Cargill, K (RS); Duran, S (RS); Estrella, H (RS); Gonzalez de la torre, S (RS, past); Lukin, J (RS, past)

**Atlanta VA Medical Center:** Phillips, LS (PI); Burgess, E (Co-I); Olson, D (Co-I); Rhee, M (Co-I); Wilson, P (Co-I); Raines, TS (SC); Boers, J (SC); Costello, J (SC); Maher-Albertelli, M (SC); Mungara, R (SC); Savoye, L (SC, past); White, CA (SC); Gullett, C (SC, past); Holloway, L (SC, past); Morehead, F (SC, past); Person, S (SC, past); Sibymon, M (SC, past); Tanukonda, S (SC, past); Adams, C (RC, past); Ross, A (RC, past)

**Baylor College of Medicine:** Balasubramanyam, A (PI); Gaba, R (Co-I); Gonzalez Hattery, E (SC); Ideozu, A (SC); Jimenez, J (SC); Montes, G (RC); Wright, C (RS, past)

**Baylor Scott & White Research Institute (Baylor Research Institute):** Hollander, P (PI); Roe, E (Co-I, past); Jackson, A (SC); Smiley, A (SC); Burt, P (SC, past); Estrada, L (RS); Chionh, K (RS, past)

**Case Western Reserve University/Cleveland VA/MetroHealth Medical Center:** Ismail-Beigi, F (PI); Falck-Ytter, C (Co-PI); Sayyed Kassem, L (Co-PI); Sood, A (Co-PI, past); Tiktin, M (Co-I, SC); Kulow, T (SC); Newman, C (SC); Stancil, KA (SC); Cramer, B (SC, past); Iacoboni, J (SC, past); Kononets, MV (SC, past); Sanders, C (SC, past); Tucker, L (SC, past); Werner, A (SC, past); Maxwell, A (RS); McPhee, G (RS); Patel, C (RS); Colosimo, L (RS, past); Krol, A (RS, past)

**Columbia University Medical Center:** Goland, R (PI); Pring, J (SC); Alfano, L (SC); Kringas, P (SC, past); Hausheer, C (RC, past); Tejada, J (RC, past); Gumpel, K (RS, past); Kirpich, A (RS, past); Schneier, H (RS, past)

**Duke University Medical Center:** Green, JB (PI); AbouAssi, H (Co-I); Chatterjee, R (Co-I); Feinglos, MN (Co-I, past); English Jones, J (SC, RC); Khan, SA (SC, RC); Kimpel, JB (SC, past); Zimmer, RP (SC, past); Furst, M (RC, past); Satterwhite, BM (RS); Thacker, CR (RS); Evans Kreider, K (RS, past)

**Indiana University:** Mariash, CN (PI); Mather, KJ (PI, past); Ismail, HM (Co-I); Lteif, A (Co-I, past); Mullen, M (SC); Hamilton, T (SC, past); Patel, N (SC, past); Riera, G (RC); Jackson, M (RC, past); Pirics, V (RC, past); Aguillar, D (RS, past); Howard, D (RS, past); Hurt, S (RS, past)

**International Diabetes Center:** Bergenstal, R (PI); Carlson, A (Co-I); Martens, T (Co-I); Johnson, M (SC); Hill, R (SC); Hyatt, J (SC); Jensen, C (SC); Madden, M (SC); Martin, D (SC); Willis, H (SC); Konerza, W (RS); Yang, S (RS); Kleeberger, K (RS, past); Passi, R (RS, past)

**Kaiser Permanente Northwest:** Fortmann, S (PI); Herson, M (Co-I); Mularski, K (Co-I); Glauber, H (Co-I, past); Prihoda, J (Co-I, past); Ash, B (SC); Carlson, C (SC); Ramey, PA (SC); Schield, E (SC); Torgrimson-Ojerio, B (SC); Arnold, K (SC, past); Kauffman, B (SC, past); Panos, E (SC, past); Sahnow, S (RC); Bays, K (RS); Berame, K (RS); Cook, J (RS); Ghioni, D (RS); Gluth, J (RS); Schell, K (RS); Criscola, J (RS, past); Friason, C (RS, past); Jones, S (RS, past); Nazarov, S (RS, past)

**Kaiser Permanente of Georgia:** Barzilay, J (PI); Rassouli, N (Co-PI); Puttnam, R (Co-I); Ojoawo, B (SC); Nelson, R (RC); Curtis, M (SC, past); Hollis, B (SC, past); Sanders-Jones, C (SC, past); Stokes, K (SC, past); El-Haqq, Z (RS, past); Kolli, A (RS, past); Tran, T (RS, past)

**Massachusetts General Hospital:** Wexler, D (PI); Larkin, ME (Co-I, SC); Meigs, J (Co-I); Chambers, B (SC, past); Dushkin, A (SC, past); Rocchio, G (SC, past); Yepes, M (SC, past); Steiner, B (RC); Dulin, H (RC, past); Cayford, M (RS); Chu, K (RS); DeManbey, A (RS); Hillard, M (RS); Martin, K (RS); Thangthaeng, N (RS); Gurry, L (RS, past); Kochis, R (RS, past); Raymond, E (RS, past); Ripley, V (RS, past); Stevens, C (RS, past)

**MedStar Health Research Institute/ MedStar Baltimore:** Park, J (PI); Aroda, V (PI, past); Ghazi, A (Co-PI); Magee, M (Co-I); Rensing, Ann (Co-I); Loveland, A (SC); Hamm, M (SC); Hurtado, M (SC); Kuhn, A (SC); Leger, J (SC); Manandhar, L (SC); Mwicigi, F (SC); Sanchez, O (SC); Young, T (SC)

**Miami VA Healthcare System/University of Miami:** Garg, R (PI); Lagari-Libhaber, V (PI); Florez, HJ (PI, past); Valencia, WM (PI, past); Marks, J (Co-PI, past); Casula, S (Co-I); Oropesa-Gonzalez, L (SC); Hue, L (SC, past); Cuadot, A (SC, past); Nieto-Martinez, R (SC, past); Riccio Veliz, AK (SC, past); Gutt, M (RC, past); Kendal, YJ (RS, past); Veciana, B. (RS, past)

**Oregon Health & Science University:** Ahmann, A (PI); Aby-Daniel, D (Co-I); Joarder, F (Co-I); Morimoto, V (Co-I); Sprague, C (Co-I); Yamashita, D (Co-I); Cady, N (SC); Rivera-Eschright, N (SC); Kirchhoff, P (SC, past); Morales Gomez, B (RC); Adducci, J (RC, past); Goncharova, A (RC, past)

**Pacific Health Research and Education Institute/VA Pacific Islands:** Hox, SH (PI); Petrovitch, H (Co-PI); Matwichyna, M (SC); Jenkins, V (SC, past); Broadwater, L (RS); Ishii, RR (RS); Bermudez, NO (RS, past)

**Pennington Biomedical Research Center:** Hsia, DS (PI); Cefalu, WT (PI, past); Greenway, FL (Co-I); Waguespack, C (Co-I); King, E (SC); Fry, G (SC); Dragg, A (SC); Gildersleeve, B (SC); Arceneaux, J (SC); Haynes, N (SC, past); Thomassie, A (SC, past); Pavlionis, M (SC, past); Bourgeois, B (RC, past); Hazlett, C (RS)

**San Diego VA Medical Center:** Mudaliar, S (PI); Henry, R (PI, past); Boeder, S (Co-I, past); Pettus, J (Co-I, past); Diaz, E (SC); Garcia-Acosta, D (SC); Maggs, S (SC); DeLue, C (SC, past); Stallings, A (SC, past); Castro, E (RC, past); Hernandez, S (RC,

past)

**Southwestern American Indian Center:** Krakoff, J (PI); Curtis, JM (Co-I); Killeen, T (SC); Khalid, M (SC); Joshevama, E (RC, past); Diaz, E (RS); Martin, D (RS); Tsingine, K (RS); Karshner, T (RS, past)

**St. Luke's-Roosevelt Hospital:** Albu, J (Co-PI); Pi-Sunyer, FX (Co-PI, past); Frances, S (Co-I); Maggio, C (SC, past); Ellis, E (RC); Bastawrose, J (RC, past); Gong, X (RS)

**SUNY Downstate Medical Center/New York Hospital-Queens:** Banerji, MA (PI); August, P (Co-I); Lee, M (Co-I); Lorber, D (Co-I); Brown, NM (SC, RC); Josephson, DH (SC); Thomas, LL (SC, RC); Tsovia, M (SC, RC); Cherian, A (SC, RC, past); Jacobson, MH (RS); Mishko, MM (RS)

**The University of North Carolina Diabetes Care Center:** Kirkman, MS (PI); Buse, JB (Co-I); Diner, J (Co-I); Dostou, J (Co-I); Machineni, S (Co-I); Young, L (Co-I); Bergamo, K (Co-I, past); Goley, A (Co-I, past); Kerr, J (Co-I, past); Largay, JF (Co-I, past); Guarda, S (SC); Cuffee, J (SC, past); Culmer, D (SC, past); Fraser, R (RC); Almeida, H (RC, past); Coffey, S (RC, past); Debnam, E (RC, past); Kiker, L (RC, past); Morton, S (RC, past); Josey, K (RS); Fuller, G (RS, past)

**University of Alabama Birmingham:** Garvey, WT (PI); Cherrington, AL (Co-PI); Dyer, D (SC); Lawson, MCR (SC); Griffith, O (SC, past); Agne, A (RC); McCullars, S (RC)

**University of Cincinnati/Cincinnati VA Medical Center:** Cohen, RM (PI); Craig, J (SC); Rogge, MC (SC, past); Burton, K (SC, past); Kersey, K (SC, RC, past); Wilson, C (SC, past); Lipp, S (RC, past); Vonder Meulen, MB (RC, past); Adkins, C (RS); Onadeko, T (RS)

**University of Colorado-Denver/VA:** Rasouli, N (PI); Baker, C (Co-I); Schroeder, E (Co-I, past); Razzaghi, M (Co-I); Lyon, C (Co-I, past); Penaloza, R (Co-I, past); Underkofler, C (SC); Lorch, R (SC); Douglass, S (SC, past); Steiner, S (SC, past)

**University of Iowa:** Sivitz, WI (PI); Cline, E (SC); Knosp, LK (SC); McConnell, J (SC, past); Lowe, T (RC)

**University of Michigan:** Herman, WH (PI); Pop-Busui, R (Co-PI); Tan, MH (Co-I); Martin, C (SC); Waltje, A (SC, RC); Katona, A (SC); Goodhall, L (SC, past); Eggleston, R (RC, past); Kuo, S (RS); Bojescu, S (RS, past); Bule, S (RS, past); Kessler, N (RS, past); LaSalle, E (RS, past); Whitley, K (RS, past)

**University of Minnesota:** Seaquist, ER (PI); Bantle, A (Co-I); Harindhanavudhi, T (Co-I); Kumar, A (Co-I); Redmon, B (Co-I); Bantle, J (Co-I, past); Coe, M (SC); Mech, M (SC); Taddese, A (RC); Lesne, L (RS); Smith, S (RS)

**University of Nebraska Medical Center/Omaha VA:** Desouza, C (PI); Kuechenmeister, L (Co-I); Shivaswamy, V (Co-I); Burbach, S (SC); Rodriguez, MG (SC); Seipel, K (SC); Alfred, A (SC, past); Morales, AL (SC, past); Eggert, J (RS); Lord, G (RS); Taylor, W (RS, past); Tillson, R (RS, past)

**University of New Mexico:** Schade, DS (PI); Adolphe, A (Co-PI); Burge, M (Co-PI, past); Duran-Valdez, E (SC); Martinez, J (RC, past); Bancroft, A (RS); Kunkel, S (RS); Ali Jamaledin Ahmad, F (RS, past); Hernandez McGinnis, D (RS, past); Pucchetti, B (RS, past); Scripsick, E (RS, past); Zamorano, A (RS, past)

**UT Health San Antonio:** DeFronzo, RA (PI); Cersosimo, E (Co-PI); Abdul-Ghani, M (Co-I); Triplitt, C (Co-I); Juarez, D (SC); Mullen, M (SC); Garza, RI (SC, past); Verastiqui, H (SC, past); Wright, K (RC, past); Puckett, C (RS)

**University of Texas-Southwestern Medical Center:** Raskin, P (PI); Rhee, C (Co-I, past); Abraham, S (SC); Jordan, LF (SC); Sao, S (SC); Morton, L (SC, past); Smith, O (SC, past); Osornio Walker, L (RC, past); Schnurr-Breen, L (RC, past); Ayala, R (RS); Kreymer, RB (RS); Sturgess, D (RS, past)

**VA Puget Sound Health Care System/University of Washington:** Utzschneider, KM (PI); Kahn, SE (Co-I); Alarcon-Casas Wright, L (Co-I); Boyko, EJ (Co-I); Tsai, EC (Co-I); Trencle, DL (Co-I, past); Trikidanathan, S (Co-I, past); Fattaleh, BN (SC); Montgomery, BK (SC, past); Atkinson, KM (RS); Kozeidub, A (RS); Concepcion, T (RS, past); Moak, C (RS, past); Prihodko, N (RS, past); Rhothisen, S (RS, past)

**Vanderbilt University:** Elasy, TA (PI); Martin, S (SC); Shackelford, L (RC, RS, past); Goidel, R (RS); Hinkle, N (RS); Lovell, C (RS); Myers, J (RS); Lipps Hogan, J (RS, past)

**Washington University:** McGill, JB (PI); Salam, M (Co-I); Schweiger, T (SC, RC); Kissel, S (SC, RC, past); Recklein, C (SC, past); Clifton, MJ (RS)

**Yale University/Fair Haven Community Health Center/West Haven VA Medical Center:** Tamborlane, W (PI); Camp, A (Co-I); Gulanski, B (Co-I); Inzucchi, SE (Co-I); Pham, K (Co-I); Alguard, M (SC, RC); Gatcomb, P (SC); Lessard, K (SC); Perez, M (SC); Iannone, L (RC); Magenheimer, E (RC); Montosa, A (RC)

## Study Units

**NIH/NIDDK (Sponsor):** Cefalu, WT (Director, Division of Diabetes, Endocrinology and Metabolic Diseases); Fradkin, J (Director, Division of Diabetes, Endocrinology and Metabolic Diseases, past); Burch, HB (Project Scientist); Bremer, AA (Project Scientist, past)

**Chairman's Office, Massachusetts General Hospital, Harvard Medical School:** Nathan, DM (Study Chair, Study Co-PI)

**Executive Committee:** Nathan, DM (Study Chair, Study Co-PI); Lachin, JM (U01 Contact PI, Study Co-PI); Buse, JB (Co-I); Kahn, SE (Co-I); Krause-Steinrauf, H (Co-I, Project Director); Larkin, ME (Co-I, SC); Tikin, M (Co-I, SC); Wexler, D (PI); Burch, HB (Program Scientist); Bremer, AA (Project Scientist, past)

**Coordinating Center, The George Washington University Biostatistics Center:** Lachin, JM (U01 Contact PI, Study Co-PI); Krause-Steinrauf, H (Co-I, Project Director); Younes, N (Co-I); Bebu, I (RS); Butera, N (RS); Buys, CJ (RS); Fagan, A (RS); Gao, Y (RS); Ghosh, A (RS); Gramzinski, MR (RS); Hall, SD (RS); Kazemi, E (RS); Legowski, E (RS); Liu, H (RS); Suratt, C (RS); Tripputi, M (RS); Arey, A (RS, past); Backman, M (RS, past); Bethepu, J (RS, past); Lund, C (RS, past); Mangat Dhaliwal, P (RS, past); McGee, P (RS, past); Mesimer, E (RS, past); Ngo, L (RS, past)

**Central Biochemical Laboratory, University of Minnesota Advanced Research and Diagnostic Laboratory:** Steffes, M (PI); Seegmiller, J (Co-I); Saenger, A (Co-I, past); Arends, V (SC); Gabrielson, D (SC, past)

**Drug Distribution Center, VA Cooperative Studies Program Clinical Research Pharmacy Coordinating Center:** Conner, T (PI); Warren, S (PI, past); Day, J (RS); Huminik, J (RS); Scrymgeour, A (RS)

**ECG Reading Center, EPICARE, Wake Forest University:** Soliman, EZ (PI); Pokharel, Y (PI, past), Zhang, ZM (Co-I, past); Campbell, C (SC); Hu, J (SC); Keasler, L (SC); Hensley, S (SC, past); Li, Y (RS)

**Economic Evaluation and Assessment Center:**

**University of Michigan:** Herman, WH (PI); Kuo, S (RS); Martin, C (SC); Waltje, A (SC, RC); Mihalcea, R (RS); Min, DJ (RS); Perez-Rosas, V (RS); Prosser, L (RS); Resnicow, K (RS); Ye, W (RS)

**Centers for Disease Control and Prevention:** Shao, H (RS); Zhang, P (RS)

**Neurocognitive Coordinating Center, Columbia University Medical Center:** Luchsinger, J (PI); Sanchez, D (SC); Assuras, S (RS)

**QWB Reading Center, University of California San Diego Health Services Research Center:** Groessl, E (PI); Sakha, F (SC); Chong, H (SC, past); Hillery, N (RS)

**Collaborators**

**Cardiovascular Adjudication Advisor:** Everett, BM (Brigham and Women's Hospital)

**Collaborating Investigators (Recruitment Sites):** Abdouch, I (University of Nebraska Medical Center/Omaha VA); Bahtiyar, G (SUNY Downstate Medical Center); Brantley, P (Pennington Biomedical Research Center (LSU)); Broyles, FE (Swedish Medical Center); Canaris, G (University of Nebraska Medical Center/Omaha VA); Copeland, P (Massachusetts General Hospital); Craine, JJ (UW Valley Medical Center); Fein, WL (Swedish Medical Center); Gliwa, A (SUNY Downstate Medical Center); Hope, L (SUNY Downstate Medical Center); Lee, MS (SUNY Downstate Medical Center); Meiners, R (Pennington Biomedical Research Center (LSU)); Meiners, V (Pennington Biomedical Research Center (LSU)); O'Neal, H (Pennington Biomedical Research Center (LSU)); Park, JE (UW Valley Medical Center); Sacerdote, A (SUNY Downstate Medical Center); Sledge, Jr., E (Pennington Biomedical Research Center (LSU)); Soni, L (SUNY Downstate Medical Center); Steppel-Reznik, J (Massachusetts General Hospital); Turchin, A (Massachusetts General Hospital)

**Beta Cell Ancillary Study:** Brooks-Worrell, B (University of Washington); Hampe, CS (University of Washington); Palmer, JP (University of Washington); Shojaie, A (University of Washington)

**Continuous Glucose Monitoring Sub-study:** Higgins, J (Massachusetts General Hospital; Harvard Medical School)

**Emotional Distress Sub-study:** Golden, S (Johns Hopkins University); Gonzalez, J (Yeshiva University; Albert Einstein College of Medicine); Naik, A (Baylor College of Medicine); Walker, E (Albert Einstein College of Medicine)

**National Diabetes Education Program (NDEP) Sub-study:** Doner Lotenberg, L (Hager Sharp); Gallivan, JM (National Institutes of Health); Lim, J (Hager Sharp); Tuncer, DM (National Institutes of Health)

**Recruitment Ancillary Study:** Behringer-Massera, S (The Mount Sinai Hospital, Beth Israel Medical Center)

**Figure S1:** Consort Diagram

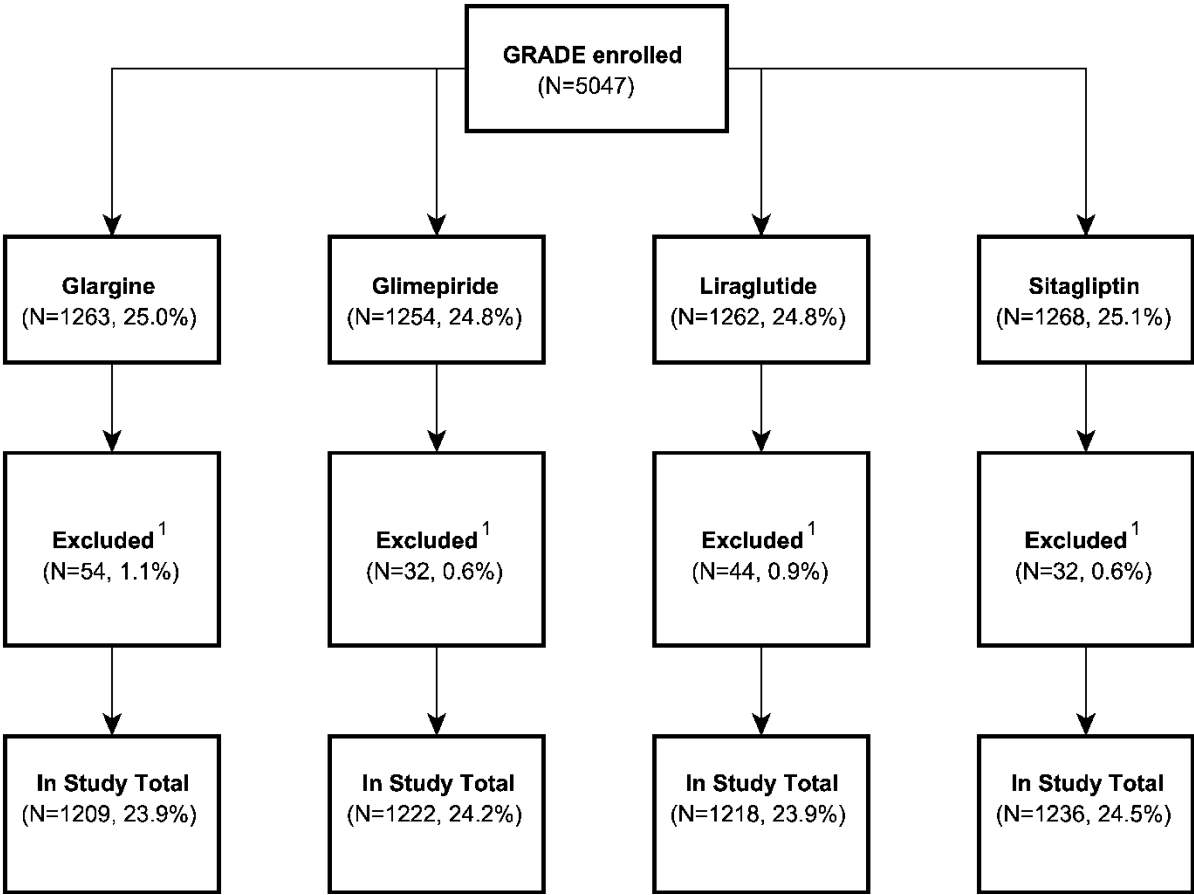

<sup>1</sup> Excluded because participants had no post baseline QOL assessments

Figure S2: Plot of mean weight over time in study by treatment group

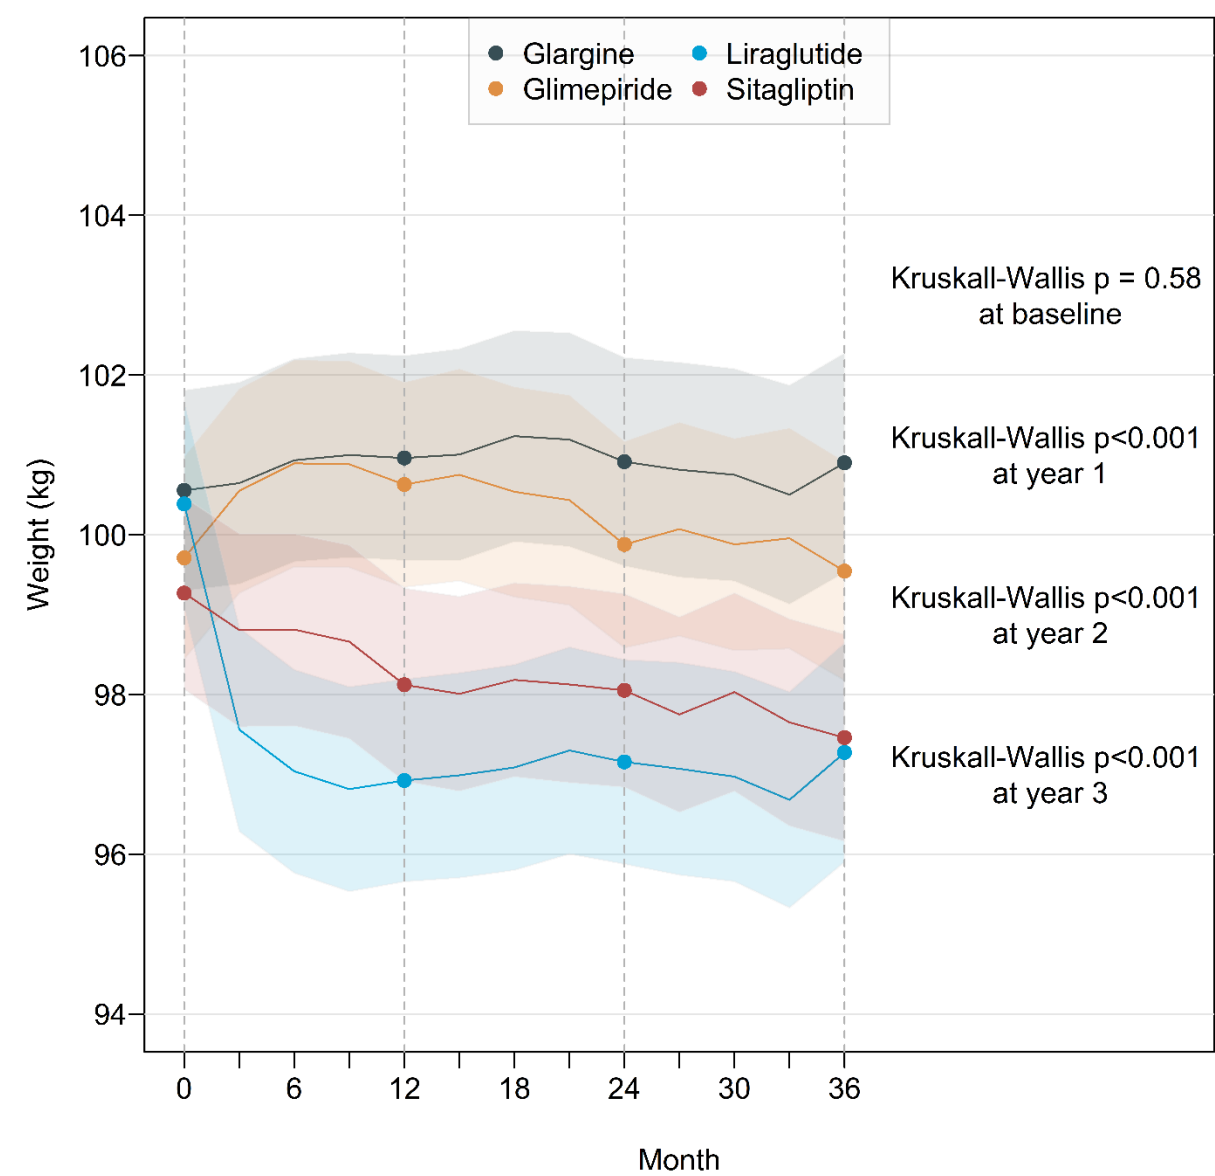

**Table S1:** Baseline characteristics of study population

|                               | All          | Glargine    | Glimepiride | Liraglutide | Sitagliptin |
|-------------------------------|--------------|-------------|-------------|-------------|-------------|
| <i>Demographics</i>           |              |             |             |             |             |
| N                             | 4885         | 1209        | 1222        | 1218        | 1236        |
| Age at baseline visit (years) | 57.2 ±10.0   | 57.1 ±9.8   | 57.1 ±10.1  | 57.4 ±9.9   | 57.3 ±10.1  |
| Age group (years)             |              |             |             |             |             |
| < 45                          | 593 (12.1%)  | 142 (11.7%) | 157 (12.8%) | 150 (12.3%) | 144 (11.7%) |
| 45 - <60                      | 2251 (46.1%) | 578 (47.8%) | 542 (44.4%) | 544 (44.7%) | 587 (47.5%) |
| 60+                           | 2041 (41.8%) | 489 (40.4%) | 523 (42.8%) | 524 (43.0%) | 505 (40.9%) |
| Female                        | 1777 (36.4%) | 435 (36.0%) | 464 (38.0%) | 417 (34.2%) | 461 (37.3%) |
| Race                          |              |             |             |             |             |
| Am Ind/Alaska Native          | 134 (2.7%)   | 31 (2.6%)   | 30 (2.5%)   | 39 (3.2%)   | 34 (2.8%)   |
| Asian/Hawaiian/Pacific        | 203 (4.2%)   | 37 (3.1%)   | 53 (4.3%)   | 55 (4.5%)   | 58 (4.7%)   |
| Black                         | 957 (19.6%)  | 240 (19.9%) | 262 (21.4%) | 242 (19.9%) | 213 (17.2%) |
| Other                         | 370 (7.6%)   | 97 (8.0%)   | 88 (7.2%)   | 94 (7.7%)   | 91 (7.4%)   |
| White                         | 3221 (65.9%) | 804 (66.5%) | 789 (64.6%) | 788 (64.7%) | 840 (68.0%) |
| Ethnicity                     |              |             |             |             |             |
| Non-Hispanic                  | 3965 (81.7%) | 994 (82.8%) | 984 (81.4%) | 994 (81.9%) | 993 (80.9%) |
| Hispanic                      | 886 (18.3%)  | 207 (17.2%) | 225 (18.6%) | 220 (18.1%) | 234 (19.1%) |
| Education completed           |              |             |             |             |             |
| Less than high school         | 342 (7.0%)   | 87 (7.2%)   | 96 (7.9%)   | 74 (6.1%)   | 85 (6.9%)   |
| High school/GED               | 999 (20.5%)  | 234 (19.4%) | 248 (20.3%) | 257 (21.1%) | 260 (21.1%) |
| Some college                  | 1405 (28.8%) | 375 (31.0%) | 342 (28.0%) | 366 (30.0%) | 322 (26.1%) |
| College                       | 1309 (26.8%) | 328 (27.1%) | 317 (25.9%) | 299 (24.5%) | 365 (29.6%) |
| Graduate school               | 829 (17.0%)  | 185 (15.3%) | 219 (17.9%) | 222 (18.2%) | 203 (16.4%) |
| <i>Diabetes</i>               |              |             |             |             |             |
| BMI (kg/m <sup>2</sup> )      | 34.3 ± 6.8   | 34.4 ± 6.8  | 34.3 ± 6.9  | 34.3 ± 6.7  | 34.1 ± 6.7  |
| Duration of diabetes (years)  | 4.2 ± 2.7    | 4.2 ± 2.7   | 4.3 ± 2.8   | 4.2 ± 2.7   | 4.2 ± 2.7   |
| HbA1c (%)                     | 7.5 ± 0.5    | 7.5 ± 0.5   | 7.5 ± 0.5   | 7.5 ± 0.5   | 7.5 ± 0.5   |
| log Fasting insulin (mU/L)    | 2.9 ± 0.6    | 3.0 ± 0.6   | 2.9 ± 0.7   | 2.8 ± 0.6   | 2.9 ± 0.6   |
| Insulinogenic Index (μU/mg)   | 34.6 ± 28.6  | 37.1 ± 29.7 | 33.0 ± 27.6 | 34.3 ± 28.9 | 34.5 ± 28.3 |
| <i>Quality of Life</i>        |              |             |             |             |             |
| MCS (%)*                      | 52.5 ± 9.0   | 52.5 ± 8.9  | 52.6 ± 8.9  | 52.4 ± 9.1  | 52.3 ± 8.9  |
| PCS (%)*                      | 46.1 ± 9.5   | 46.1 ± 9.5  | 46.4 ± 9.4  | 45.8 ± 9.9  | 46.0 ± 9.3  |
| QWB Score*                    | 0.67 ± 0.14  | 0.67 ± 0.14 | 0.67 ± 0.13 | 0.67 ± 0.14 | 0.67 ± 0.14 |
| Bodily pain (%)               | 72.9 ± 24.1  | 73.0 ± 23.7 | 73.4 ± 23.7 | 72.3 ± 24.8 | 72.7 ± 23.9 |
| General health (%)            | 63.7 ± 18.8  | 63.8 ± 18.7 | 64.4 ± 18.5 | 63.6 ± 19.1 | 62.9 ± 18.7 |
| Vitality (%)                  | 59.2 ± 20.9  | 58.6 ± 20.9 | 59.6 ± 20.8 | 59.5 ± 21.5 | 59.1 ± 20.6 |
| Mental health (%)             | 79.2 ± 16.4  | 79.3 ± 16.2 | 79.5 ± 16.2 | 79.1 ± 16.7 | 78.7 ± 16.6 |
| Physical functioning (%)      | 76.4 ± 24.8  | 76.7 ± 24.7 | 76.8 ± 24.3 | 75.9 ± 25.5 | 76.2 ± 24.8 |
| Role emotional (%)            | 83.4 ± 31.8  | 84.0 ± 31.0 | 83.6 ± 31.4 | 82.6 ± 32.8 | 83.2 ± 31.9 |
| Role physical (%)             | 78.1 ± 35.3  | 78.4 ± 35.1 | 79.1 ± 34.6 | 76.6 ± 36.2 | 78.1 ± 35.2 |
| Social functioning (%)        | 84.6 ± 21.7  | 84.9 ± 21.2 | 85.6 ± 21.5 | 83.5 ± 22.1 | 84.6 ± 22.1 |

PCS = Physical Component Summary score derived from the 8 subscales of the SF-36 questionnaire

MCS = Mental Component Summary score derived from the 8 subscales of the SF-36 questionnaire

QWB = Summary score from the Quality of Well-Being self-administered questionnaire

GED = General equivalency diploma

\*The QWB summary score (QWB-SA Form) ranges between 0 and 1 with higher scores indicating better quality of life. The MCS and PCS summary scores (SF-36 Form) both range between 0-100%, with higher scores indicating better function.

**Table S2:** Mean change from baseline for all component outcomes of the SF-36

| Time     | Outcome                  | Glargine                      | Glimepiride                   | Liraglutide                   | Sitagliptin                   |
|----------|--------------------------|-------------------------------|-------------------------------|-------------------------------|-------------------------------|
| Year 1   | Bodily pain (%)          | 0.92 (-0.14,1.97)             | 1.43 (0.37,2.48) <sup>‡</sup> | 3.17 (2.12,4.22) <sup>§</sup> | 2.53 (1.48,3.58) <sup>§</sup> |
| (N=4820) | General health (%)       | 2.31 (1.53,3.10) <sup>§</sup> | 2.08 (1.30,2.87) <sup>§</sup> | 3.59 (2.81,4.37) <sup>§</sup> | 2.15 (1.37,2.93) <sup>§</sup> |
|          | Vitality (%)             | 1.55 (0.67,2.42) <sup>§</sup> | 1.60 (0.73,2.48) <sup>§</sup> | 2.90 (2.02,3.77) <sup>§</sup> | 1.58 (0.71,2.45) <sup>§</sup> |
|          | Mental health (%)        | 1.19 (0.45,1.93) <sup>‡</sup> | 1.33 (0.60,2.07) <sup>§</sup> | 1.77 (1.04,2.51) <sup>§</sup> | 1.68 (0.95,2.42) <sup>§</sup> |
|          | Physical functioning (%) | 1.78 (0.68,2.88) <sup>‡</sup> | 1.34 (0.24,2.44) <sup>‡</sup> | 2.65 (1.54,3.75) <sup>§</sup> | 1.92 (0.82,3.02) <sup>§</sup> |
|          | Role emotional (%)       | 1.65 (0.08,3.22) <sup>‡</sup> | 1.43 (-0.13,3.00)             | 1.17 (-0.40,2.73)             | 2.10 (0.54,3.66) <sup>‡</sup> |
|          | Role physical (%)        | 1.09 (-0.58,2.76)             | 1.64 (-0.03,3.31)             | 3.72 (2.05,5.39) <sup>§</sup> | 2.20 (0.54,3.86) <sup>‡</sup> |
|          | Social functioning (%)   | 0.65 (-0.40,1.71)             | 0.21 (-0.84,1.27)             | 0.66 (-0.39,1.72)             | 1.08 (0.03,2.13) <sup>‡</sup> |
| Year 2   | Bodily pain (%)          | 0.34 (-0.79,1.47)             | 1.55 (0.43,2.67) <sup>‡</sup> | 1.53 (0.41,2.65) <sup>‡</sup> | 1.35 (0.23,2.46) <sup>‡</sup> |
| (N=4726) | General health (%)       | 1.93 (1.12,2.74) <sup>§</sup> | 1.84 (1.04,2.64) <sup>§</sup> | 2.89 (2.09,3.69) <sup>§</sup> | 2.42 (1.62,3.22) <sup>§</sup> |
|          | Vitality (%)             | 2.02 (1.09,2.94) <sup>§</sup> | 2.11 (1.20,3.03) <sup>§</sup> | 2.90 (1.99,3.81) <sup>§</sup> | 2.48 (1.57,3.40) <sup>§</sup> |
|          | Mental health (%)        | 1.72 (0.95,2.48) <sup>§</sup> | 1.91 (1.15,2.67) <sup>§</sup> | 1.63 (0.87,2.39) <sup>§</sup> | 1.93 (1.17,2.69) <sup>§</sup> |
|          | Physical functioning (%) | 0.11 (-1.08,1.29)             | 1.03 (-0.14,2.21)             | 1.86 (0.68,3.03) <sup>‡</sup> | 1.78 (0.61,2.96) <sup>‡</sup> |
|          | Role emotional (%)       | 0.01 (-1.63,1.66)             | 1.63 (-0.01,3.26)             | 0.47 (-1.16,2.10)             | 0.90 (-0.73,2.54)             |
|          | Role physical (%)        | -0.25 (-2.03,1.53)            | 1.10 (-0.67,2.86)             | -0.08 (-1.85,1.68)            | 0.35 (-1.41,2.11)             |
|          | Social functioning (%)   | 0.40 (-0.69,1.50)             | 1.01 (-0.07,2.10)             | -0.32 (-1.41,0.76)            | 1.48 (0.39,2.56) <sup>‡</sup> |
| Year 3   | Bodily pain (%)          | 0.81 (-0.33,1.94)             | 2.13 (1.00,3.26) <sup>§</sup> | 1.88 (0.75,3.01) <sup>‡</sup> | 0.88 (-0.25,2.00)             |
| (N=4604) | General health (%)       | 0.62 (-0.23,1.46)             | 0.75 (-0.09,1.59)             | 1.74 (0.91,2.58) <sup>§</sup> | 1.64 (0.81,2.48) <sup>§</sup> |
|          | Vitality (%)             | 1.47 (0.51,2.44) <sup>‡</sup> | 1.89 (0.93,2.84) <sup>§</sup> | 1.79 (0.84,2.74) <sup>§</sup> | 1.92 (0.97,2.88) <sup>§</sup> |
|          | Mental health (%)        | 1.38 (0.58,2.17) <sup>§</sup> | 1.74 (0.95,2.53) <sup>§</sup> | 1.31 (0.52,2.09) <sup>‡</sup> | 1.94 (1.16,2.73) <sup>§</sup> |
|          | Physical functioning (%) | 0.33 (-0.86,1.52)             | 1.05 (-0.14,2.23)             | 1.17 (-0.01,2.36)             | 0.94 (-0.24,2.12)             |
|          | Role emotional (%)       | -0.06 (-1.76,1.64)            | 0.64 (-1.05,2.33)             | 0.99 (-0.69,2.67)             | 0.05 (-1.63,1.73)             |
|          | Role physical (%)        | -0.92 (-2.76,0.92)            | 0.94 (-0.89,2.77)             | -0.14 (-1.96,1.69)            | 0.38 (-1.44,2.20)             |
|          | Social functioning (%)   | -0.39 (-1.54,0.76)            | 0.96 (-0.18,2.10)             | -0.11 (-1.25,1.03)            | -0.02 (-1.16,1.11)            |

Statistics reported in the table cells are mean change from baseline (95% confidence interval).

Superscripts in each cell of the table give the unadjusted significance level of the test of the mean change equal to zero (†:  $p < 0.05$ , ‡:  $p < 0.01$ , §:  $p < 0.001$ ).

Note that ANOVA tests of any group differences were performed for each outcome at each timepoint and none were significantly different from zero after FDR adjusting for 8 tests at each timepoint.



**Table S3:** Number of participants initiating rescue insulin by study year.

| <b>Landmark<br/>Time point</b>          | <b>Glargine<br/>(N=1263)</b> | <b>Glimepiride<br/>(N=1254)</b> | <b>Liraglutide<br/>(N=1262)</b> | <b>Sitagliptin<br/>(N=1268)</b> |
|-----------------------------------------|------------------------------|---------------------------------|---------------------------------|---------------------------------|
| <i>1-year</i>                           |                              |                                 |                                 |                                 |
| Participants                            | 1199                         | 1207                            | 1208                            | 1167                            |
| No. Initiating Insulin (%) <sup>*</sup> | 10 (0.8%)                    | 16 (1.3%)                       | 29 (2.4%)                       | 53 (4.5%)                       |
| Time (yrs) <sup>†</sup>                 | 0.97                         | 0.89                            | 0.76                            | 0.79                            |
| <i>2-year</i>                           |                              |                                 |                                 |                                 |
| Participants                            | 1171                         | 1190                            | 1192                            | 1193                            |
| No. Initiating Insulin (%)              | 70 (6.0%)                    | 138 (11.6%)                     | 132 (11.1%)                     | 249 (20.9%)                     |
| Time (yrs)                              | 1.41                         | 1.41                            | 1.30                            | 1.29                            |
| <i>3-year</i>                           |                              |                                 |                                 |                                 |
| Participants                            | 1156                         | 1166                            | 1165                            | 1171                            |
| No. Initiating Insulin (%)              | 119 (10.3%)                  | 235 (20.2%)                     | 215 (18.5%)                     | 363 (31.0%)                     |
| Time (yrs)                              | 1.87                         | 1.89                            | 1.77                            | 1.67                            |

<sup>\*</sup>Denominator is the number of participants who attended the landmark visit

Numerator is the number of participants initiating rescue insulin prior to the landmark time point

<sup>†</sup>Mean time in years from randomization until rescue insulin initiation for those initiating rescue insulin prior to the landmark time point

**Table S4:** Mediation Analysis of 1-year PCS change scores

| Mediator Variable         | Treatment Effects       |                            |
|---------------------------|-------------------------|----------------------------|
|                           | Liraglutide vs Glargine | Liraglutide vs Glimepiride |
| HbA1c %                   | 5.0 (-0.4, 10.4)        | 5.8 (-0.3, 12.0)           |
| Weight                    | 52.8 (14.7, 90.9)       | 56.7 (15.9, 97.5)          |
| Non-Severe Hypoglycemia   | 1.0 (-1.8, 3.9)         | 4.6 (-3.7, 12.9)           |
| Gastrointestinal Symptoms | -6.8 (-16.9, 3.4)       | -12.7 (-25.7, 0.3)         |
| Number of SAEs            | 5.8 (-2.3, 13.8)        | 8.2 (-0.7, 17.2)           |

The percent of the treatment effects mediated by each mediator is presented with 95% confidence intervals in parentheses.

Mediation is tested for the LvI and LvG comparisons because these treatment comparisons were significantly different in the ITT analysis (Table 1)

**Table S5:** Subgroup analysis of the PCS change at annual visits by baseline body mass index (BMI) tertiles\*

| Time point (p) <sup>†</sup> | BMI (kg/m <sup>2</sup> )        | Change in PCS from baseline |                 |                 |                 |
|-----------------------------|---------------------------------|-----------------------------|-----------------|-----------------|-----------------|
|                             |                                 | Glargine (I)                | Glimepiride (G) | Liraglutide (L) | Sitagliptin (S) |
| <b>Year 1</b> (p=0.03)      | 18.2 to 30.7                    | 0.01                        | 0.71            | 0.91            | 0.77            |
|                             | 30.8 to 36.2                    | 0.96                        | 0.82            | 0.96            | 1.08            |
|                             | <b>36.3 to 74.3<sup>*</sup></b> | <b>0.92</b>                 | <b>0.32</b>     | <b>2.75</b>     | <b>0.70</b>     |
| <b>Year 2</b> (p=0.96)      | 18.2 to 30.7                    | -0.41                       | 0.41            | 0.60            | 0.36            |
|                             | 30.8 to 36.2                    | 0.03                        | 0.49            | 0.69            | 0.74            |
|                             | 36.3 to 74.3                    | 0.72                        | 0.28            | 0.99            | 0.64            |
| <b>Year 3</b> (p=0.87)      | 18.2 to 30.7                    | -0.40                       | 0.57            | 0.31            | 0.44            |
|                             | 30.8 to 36.2                    | -0.08                       | 0.63            | 0.39            | 0.33            |
|                             | 36.3 to 74.3                    | 0.59                        | 0.02            | 0.98            | 0.30            |

\*Bolded rows indicate that there are significant pairwise treatment differences between groups.

<sup>†</sup>p = p-value from the 6 degree of freedom chi-square test of global homogeneity after adjustment for all 11 subgroups tested using the false discovery rate (FDR) method of adjustment
